# Supplementary material
Source: ML conference proceedings conference paper supplement (https://openreview.net/forum?id=HNJJEWfo0Z)
Supplement: supplementary_material [file attachment]

## EXAMINING WHY PERTURBATION-BASED FIDELITY METRICS ARE INCONSISTENT - SUPPLEMENTARY MATERIAL

### S1 CAM DISAGREEMENTS

The illustration in Figure S1 presents saliency maps on randomly sampled images from the CIFAR-10, Imagenette, Oxford-IIIT Pets and PASCAL VOC 2007 datasets for pretrained ResNet50 model (imagenet weights) using AblationCAM (Ramaswamy et al., 2020), GradCAM++ (Chattopadhyay et al., 2018) and GradCAM (Selvaraju et al., 2017). It can be noted from Figure S1, the saliency maps generated using AblationCAM and GradCAM++ show a high degree of agreement, highlighting the importance of the body, neck, and head of the horse for an image from Cifar-10 dataset (1<sup>st</sup> row). However, the saliency map generated using GradCAM completely misses highlighting the head of the horse. In the 2<sup>nd</sup> row it can be observed that AblationCAM and GradCAM++ highlight not only the head of the fish but also other areas in the background as compared to GradCAM. Similarly, the saliency maps generated for the Oxford-IIIT Pets dataset image (3<sup>rd</sup> row) and PASCAL VOC 2007 image (4<sup>th</sup> row) show high inconsistency.

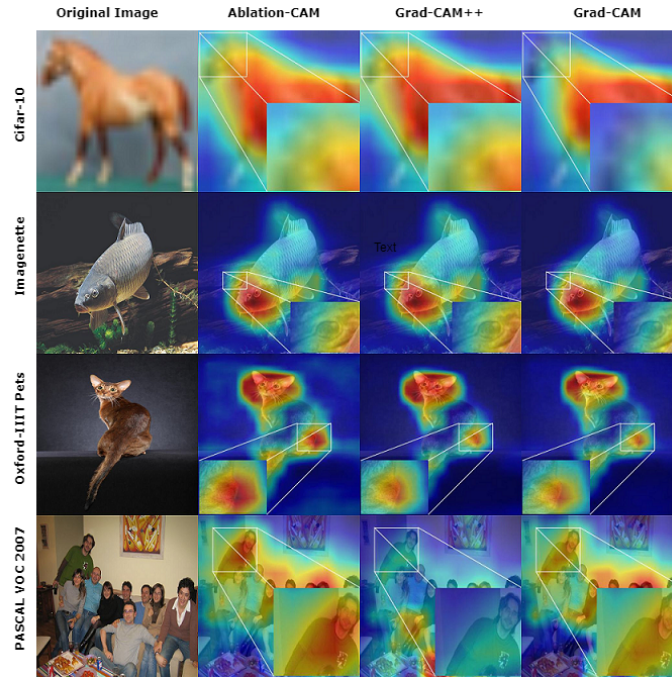

Figure S1: Disagreement between saliency maps generated using Ablation-CAM, Grad-CAM++ and Grad-CAM for ResNet50 model with imagenet weights. Each row represents a randomly chosen image from CIFAR-10, Imagenette, Oxford-IIIT Pets and PASCAL VOC 2007 datasets and their corresponding saliency maps

## S2 PIXEL SELECTION AND RANKING

Selection of pixels for our analysis is another critical aspect for our analysis. As the size of the input images are typically  $299 \times 299$ ,  $224 \times 224$  or  $600 \times 600$  pixels for models, it is computationally expensive to conduct an analysis on all pixels. We therefore conduct our analysis on a subset of pixels which were randomly selected (based on (Tomsett et al., 2020)). Our approach to randomly select the pixels can be further justified from a theoretical perspective as explained below.

Let  $Q$  be a set of pixels such that  $|Q| > 1$ . We can define a hypothetical function  $\psi(Q)$  that measures the importance of  $Q$  for the decision-making process of the model as:

$$\psi : Q \rightarrow \{1, 2, \dots, |Q|\} \subseteq \mathbb{R}$$

where  $\mathbb{R}$  is the set of all real numbers and a greater value of  $\psi(Q)$  indicates greater importance.

We can define an image  $\mathbb{A}$  as an ordered set of pixels sorted according to their importance using function  $\psi$ .

$$\mathbb{A} = \{a_1^u, a_2^v, a_3^w, \dots, a_i^z\} \quad (10)$$

where,  $R_0$  is the ordered set of pixels.  $1 \rightarrow i$  are importance for the pixel index/ids  $u \rightarrow z$  generates by  $\psi$  i.e.  $\psi(a^u) = 1, \psi(a^v) = 2 \dots \psi(a^z) = i$  etc, where a greater value of  $\psi(Q)$  indicates greater importance of the pixel set  $Q$  in the image.

Let us assume that  $\mathbb{B}$  is a randomly selected subset of pixels. Thus  $\mathbb{B}$  can be defined as below:

$$\begin{aligned} \mathbb{B} &= \{a_1^x, a_2^y, a_3^z, \dots, a_j^n\} \subseteq \mathbb{A} \quad \text{s.t.} \\ a^e &\neq a^f \quad \text{for } e \neq f \end{aligned} \quad (11)$$

where  $e$  and  $f$  are two random pixels. Let us assume that the order of pixels in  $\mathbb{A}$  and  $\mathbb{B}$  are different. This implies according to induction:

$$\begin{aligned} \exists \quad (a^p, a^q) &\in \mathbb{B} \quad \text{s.t.} \\ \psi(a^p) &> \psi(a^q) \in \mathbb{B} \quad \wedge \quad \psi(a^p) < \psi(a^q) \in \mathbb{A} \end{aligned} \quad (12)$$

However,  $\psi(a^p) > \psi(a^q) \in \mathbb{B}$  and  $\psi(a^p) < \psi(a^q) \in \mathbb{A}$  cannot be true at the same time, we can by mathematical induction deduce that  $\nexists (a^p, a^q) \in \mathbb{B}$  that satisfy both conditions given in Equation (12). As such the order of pixels as per their importance are same in both  $\mathbb{A}$  and  $\mathbb{B}$ . We leverage this property that the order of importance of the pixels do not change even in randomly selected (without repetition) subsets for our analysis. If the selected pixels have the same importance ranks, their relative orders are not considered to affect the rank correlation.

## S3 DROP SCORES FOR ALL DATASETS

## S4 PAIRWISE DISTRIBUTION PLOTS FOR PERTURBATIONS

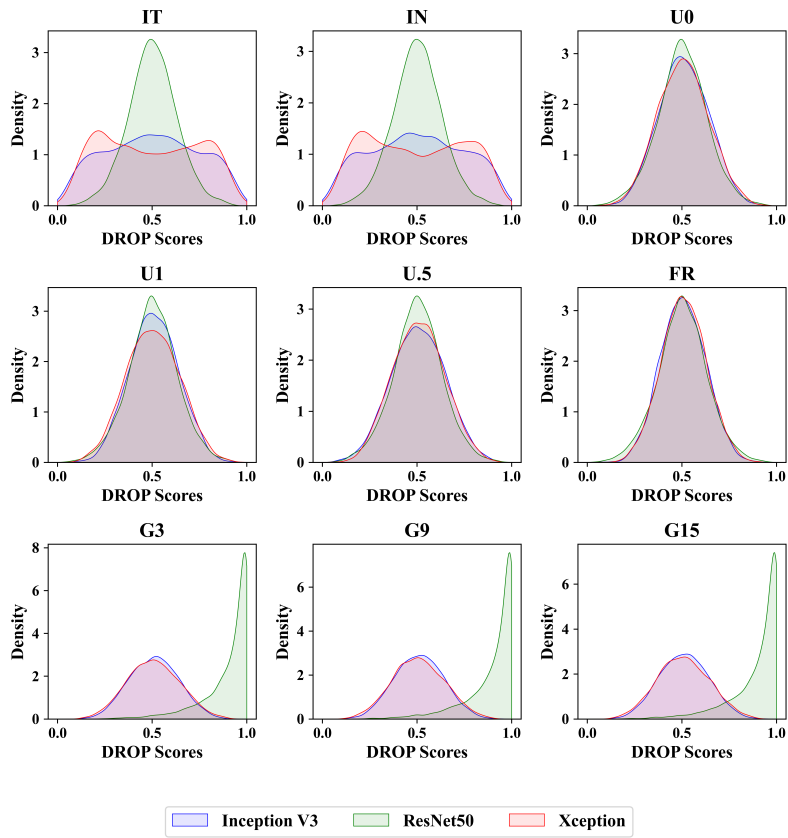

Figure S2: Distribution of *DROP* scores for all perturbations for Oxford-IIIT Pets Dataset

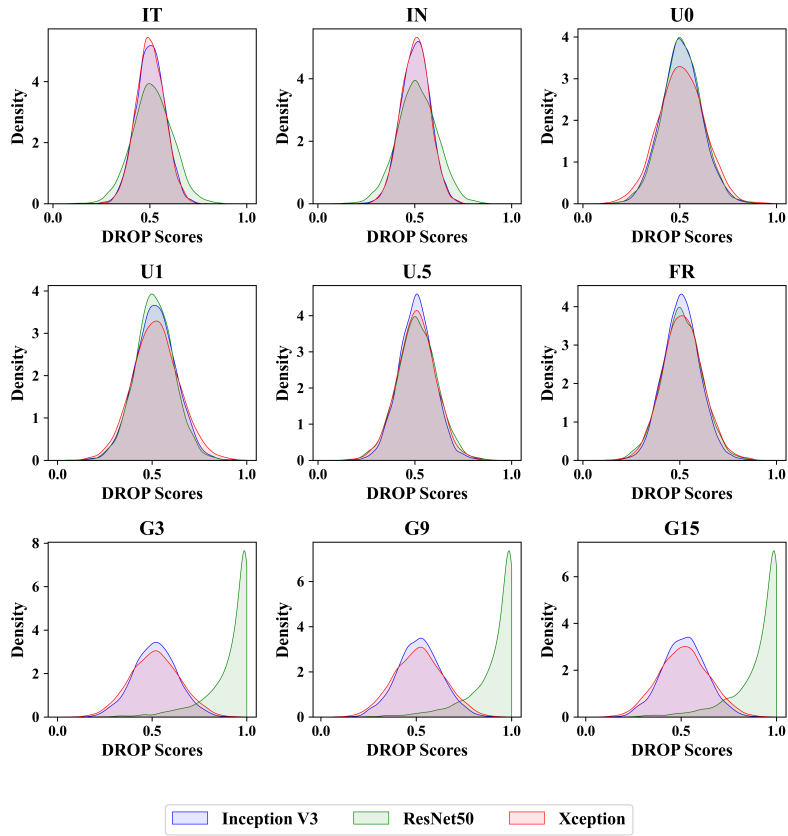

Figure S3: Distribution of *DROP* scores for all perturbations for PASCAL VOC Dataset



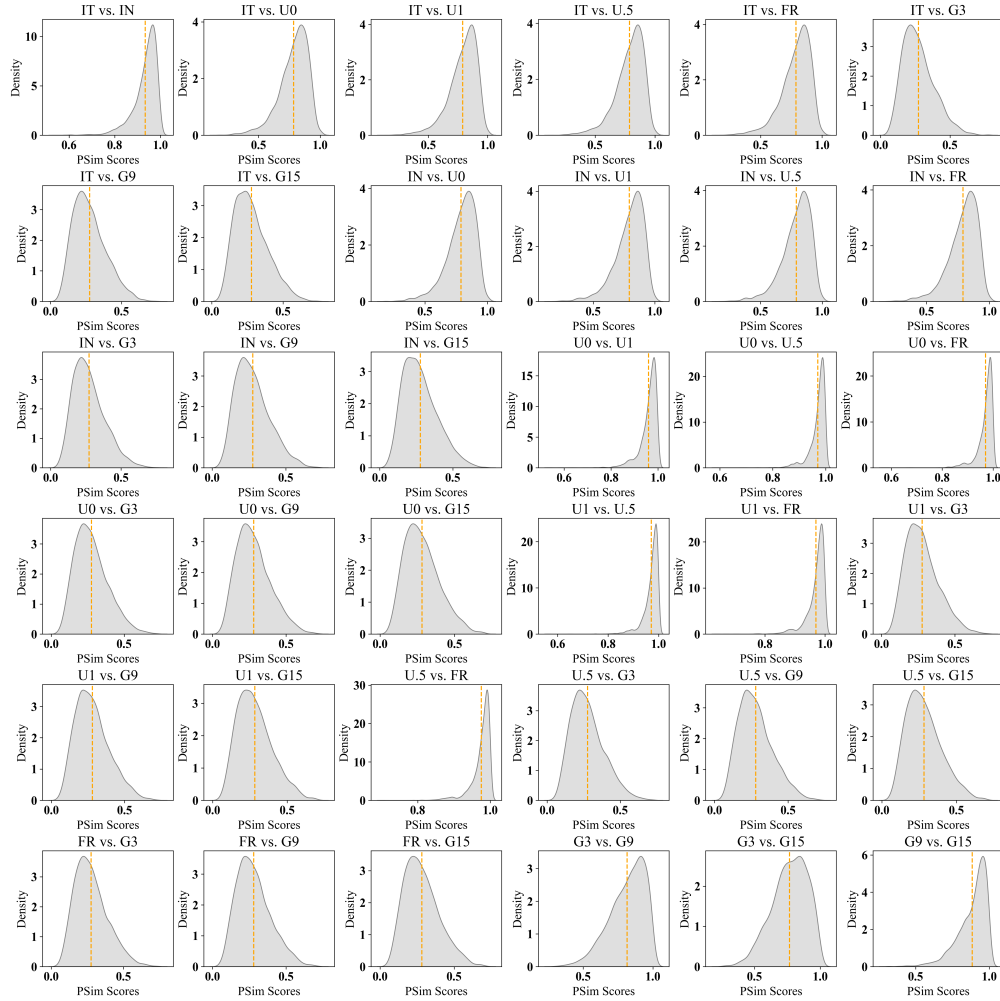

Figure S4: Distribution of pairwise  $PSim$  scores for all perturbations for Resnet50 model on Imagenette Dataset

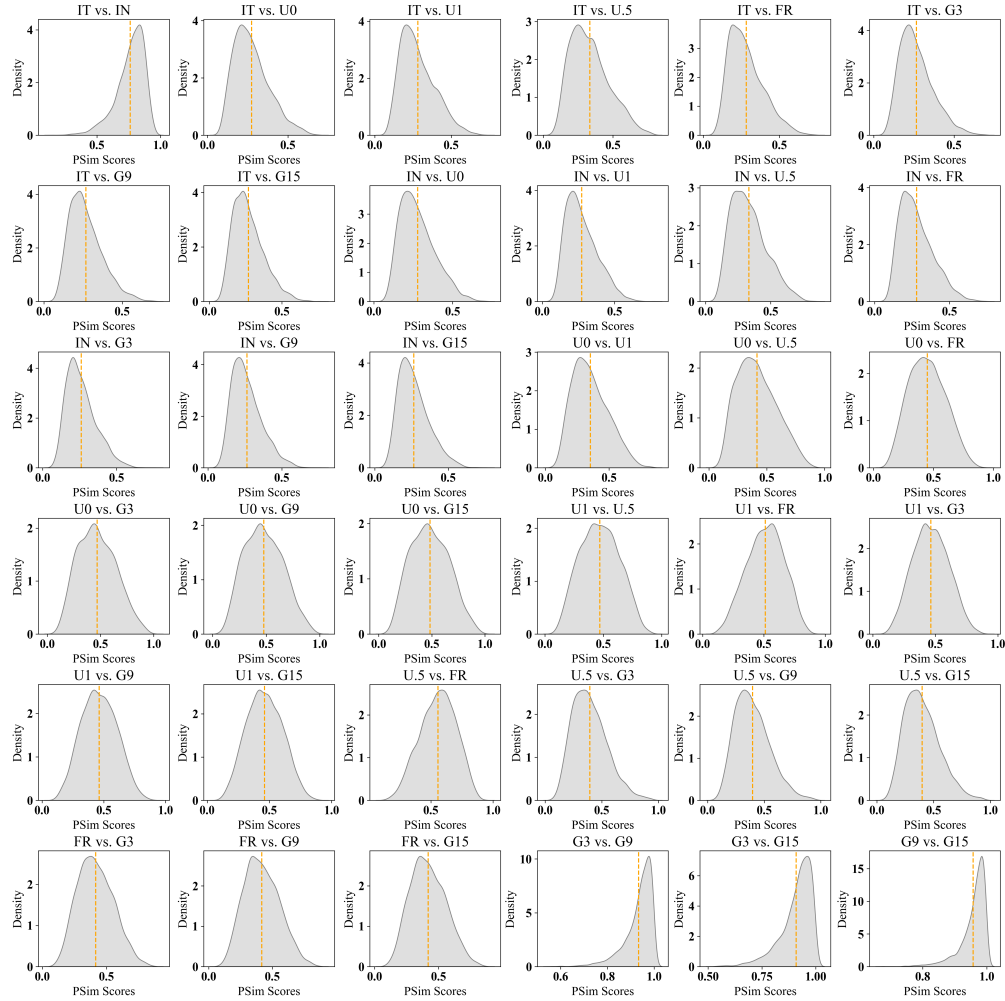

Figure S5: Distribution of pairwise  $PSim$  scores for all perturbations for Xception model on Imagenette Dataset

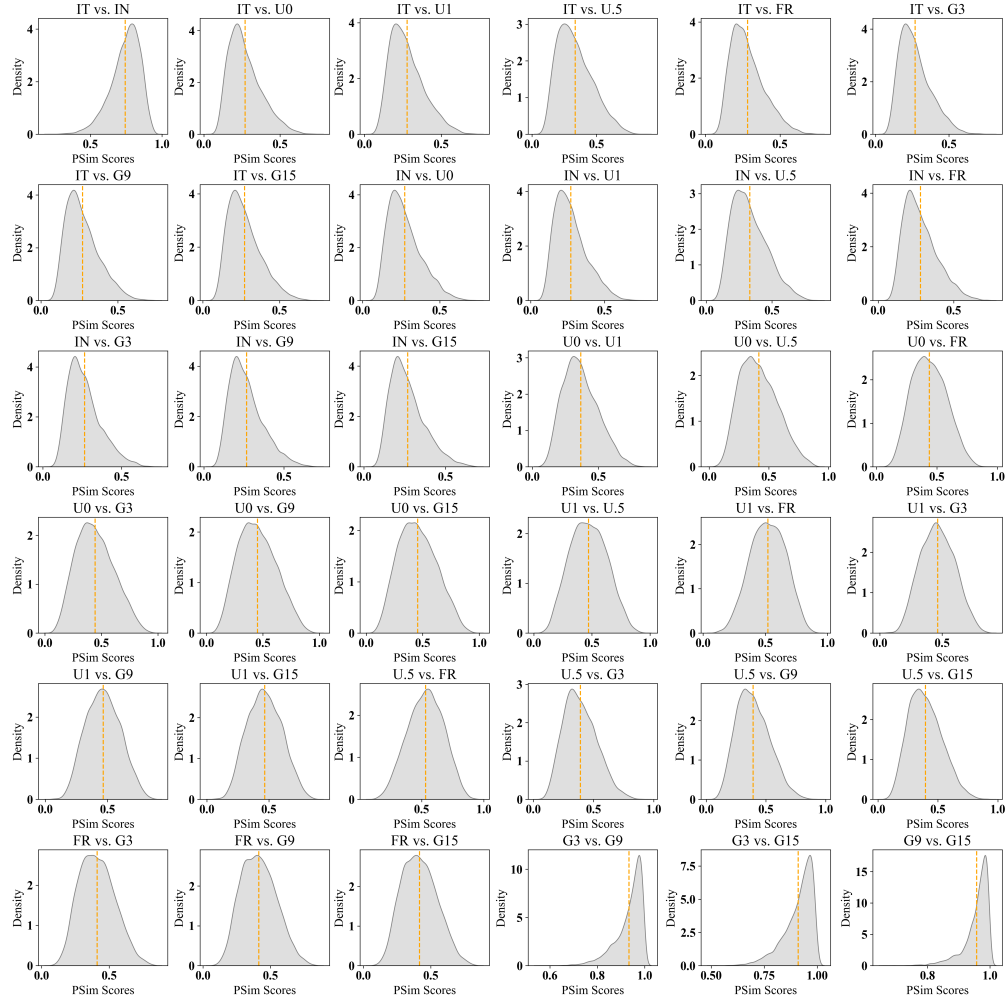

Figure S6: Distribution of pairwise *PSim* scores for all perturbations for Inception V3 model on Oxford-IIIT Pets Dataset

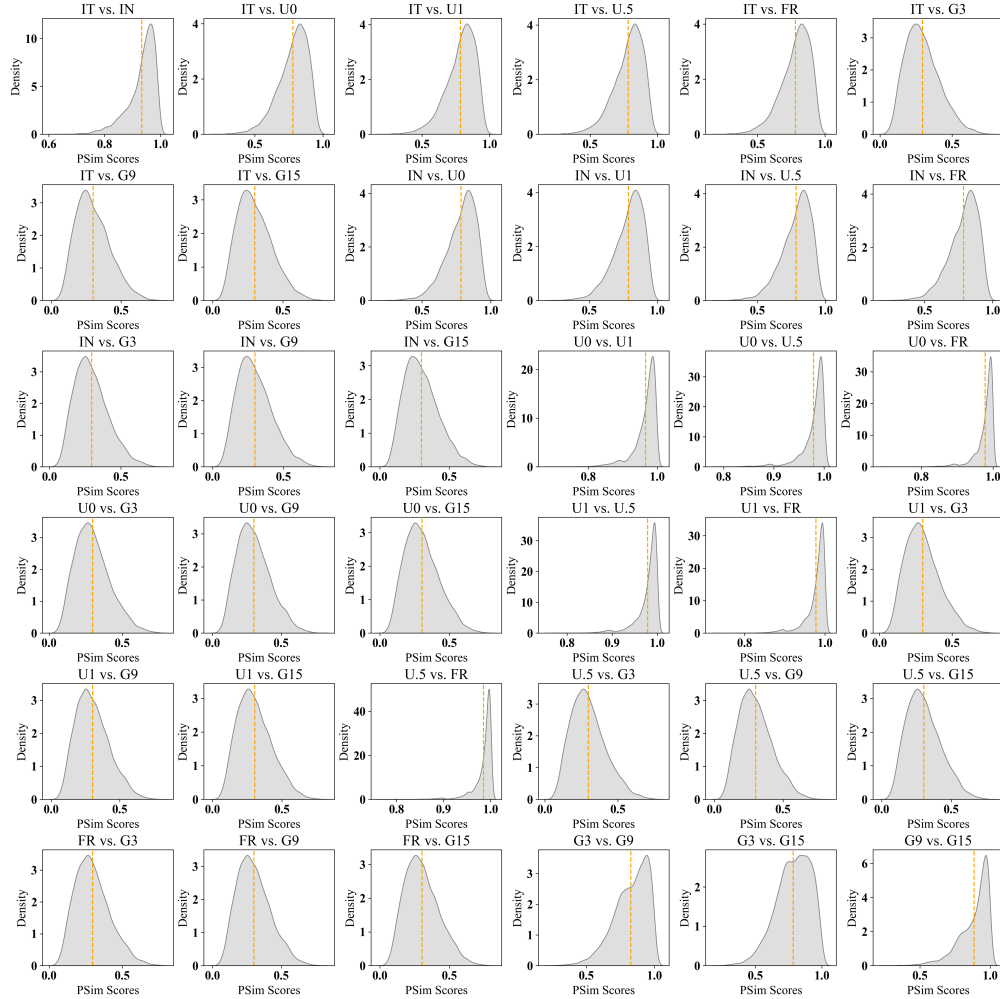

Figure S7: Distribution of pairwise  $PSim$  scores for all perturbations for Resnet50 model on Oxford-IIIT Pets Dataset

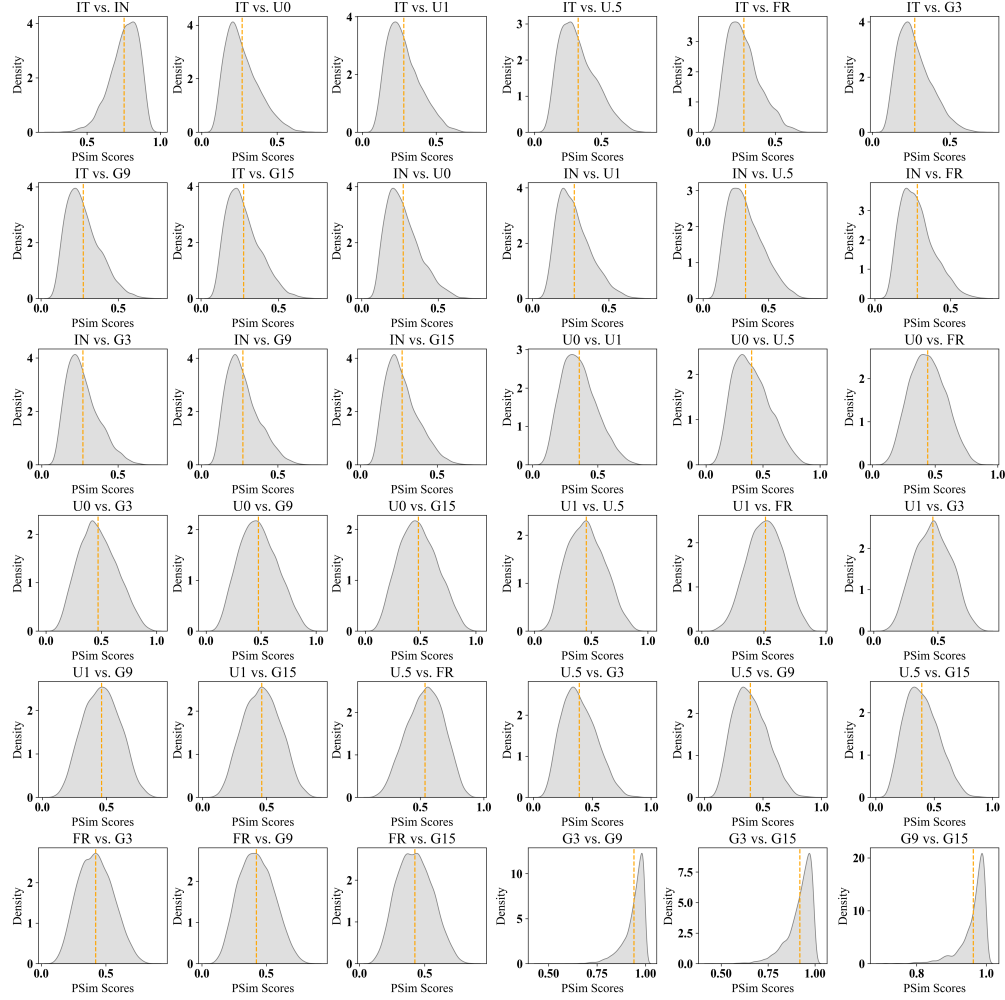

Figure S8: Distribution of pairwise *PSim* scores for all perturbations for Xception model on Oxford-IIIT Pets Dataset

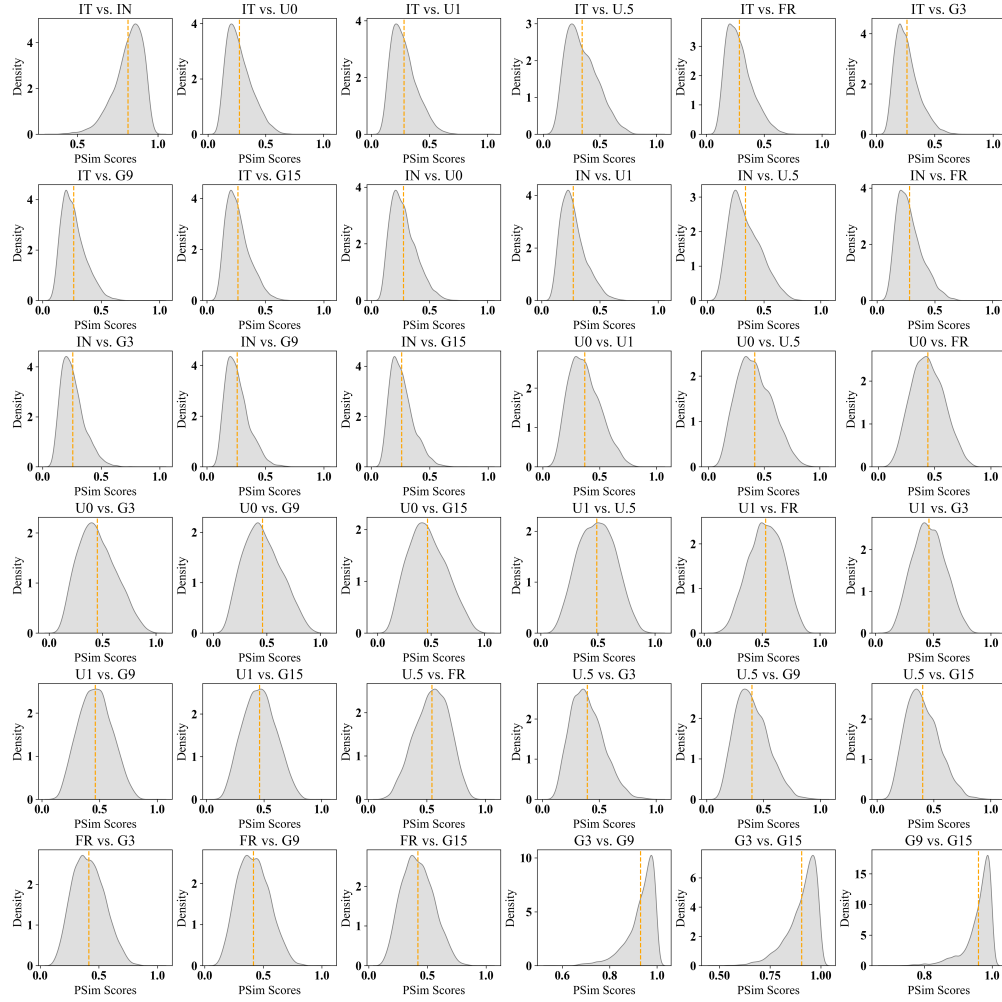

Figure S9: Distribution of pairwise  $PSim$  scores for all perturbations for Inception V3 model on PASCAL VOC Dataset

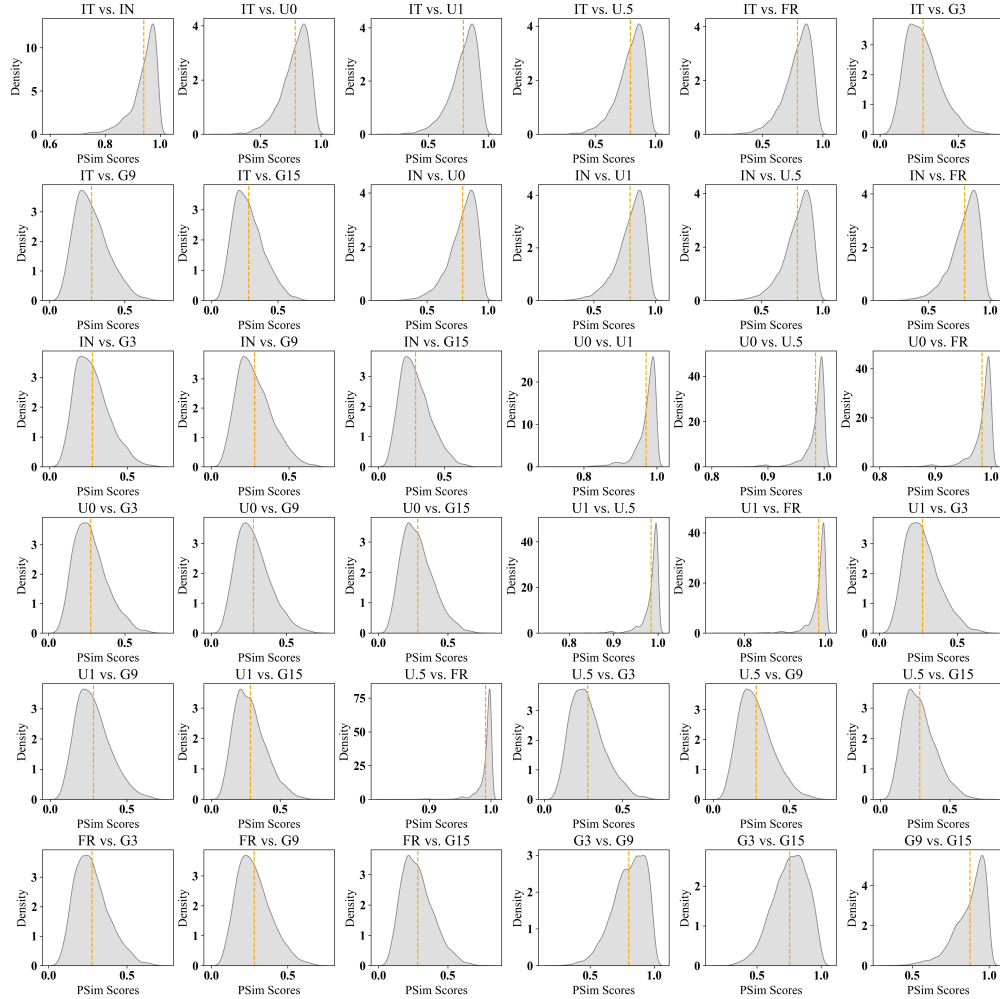

Figure S10: Distribution of pairwise  $PSim$  scores for all perturbations for Resnet50 model on PASCAL VOC Dataset

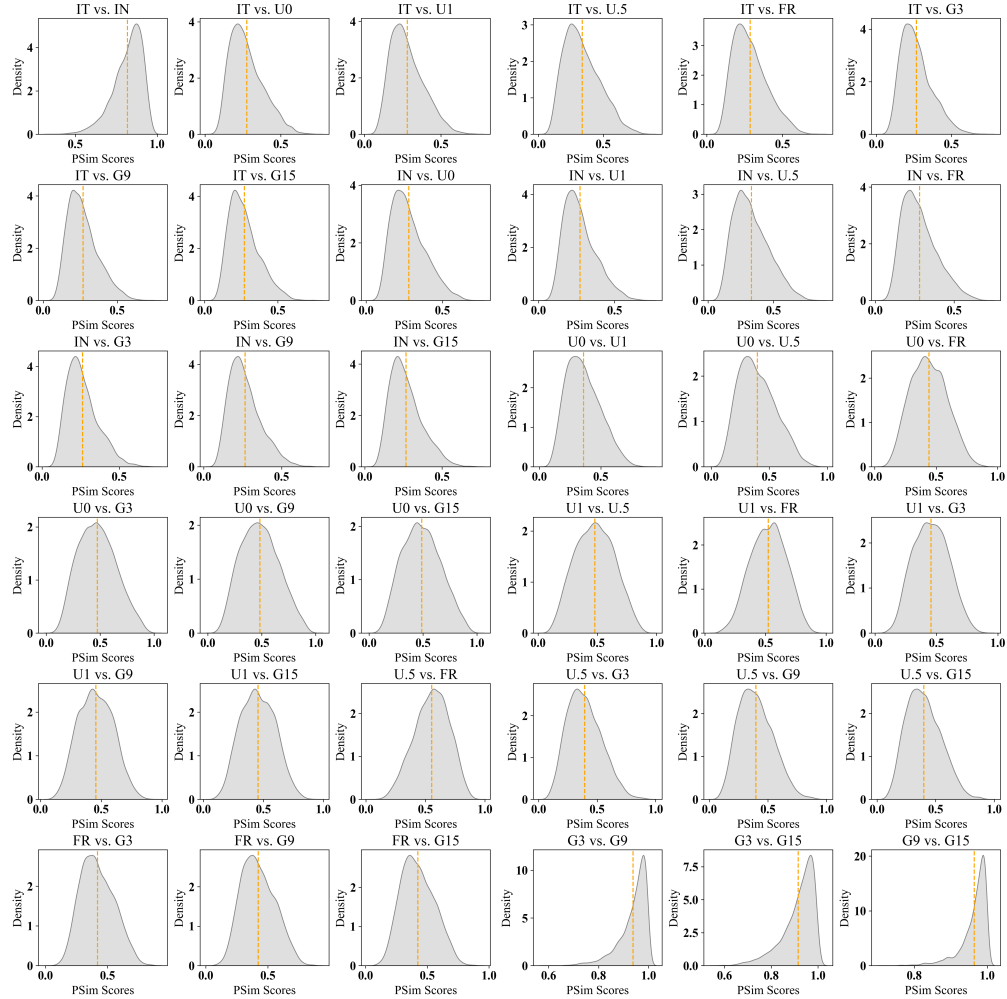

Figure S11: Distribution of pairwise  $PSim$  scores for all perturbations for Xception model on PASCAL VOC Dataset



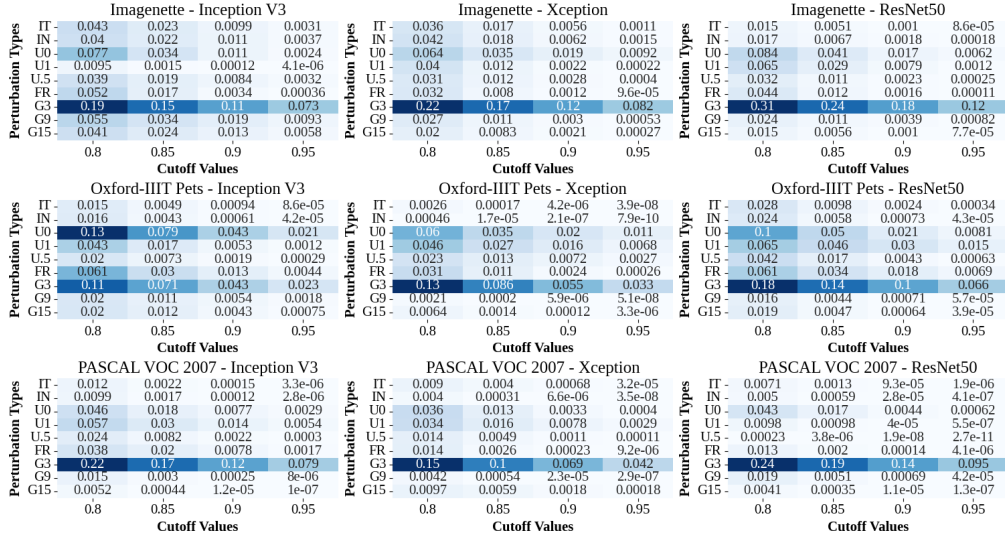

Figure S12: Distribution of *DROP* scores for dataset, model, perturbation types using segment-wise perturbation scheme

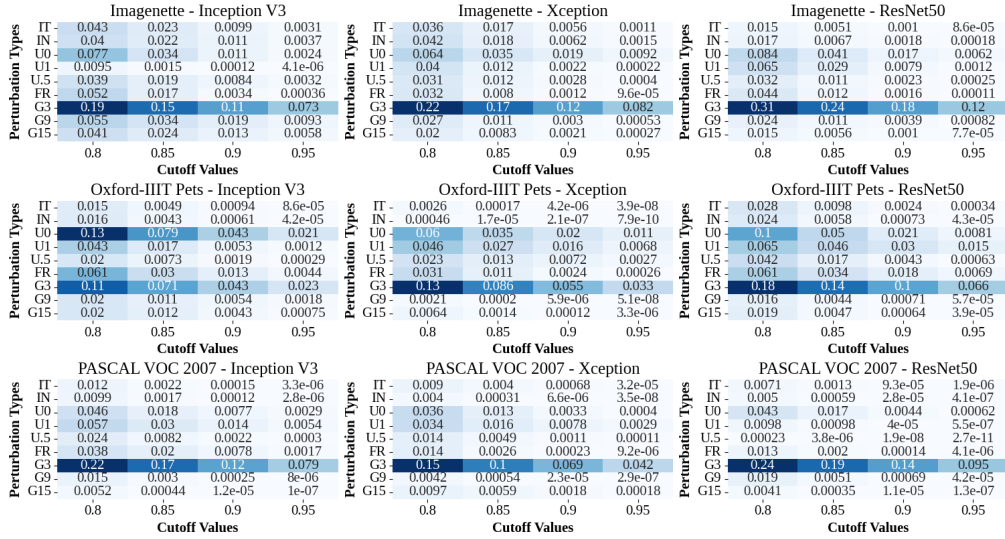

Figure S13: Distribution of *DROP* scores for dataset, model, perturbation types using pixel-wise perturbation scheme

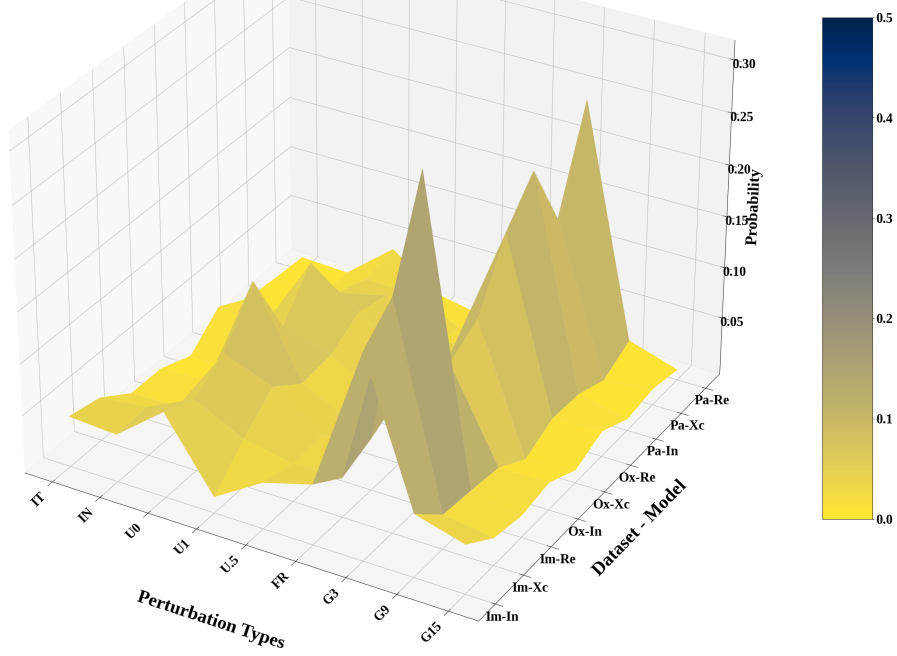

Figure S14: Probabilities of *DROPScore* to be above 0.80 for different perturbation pairs across all dataset-model combinations for segment-wise perturbation scheme.

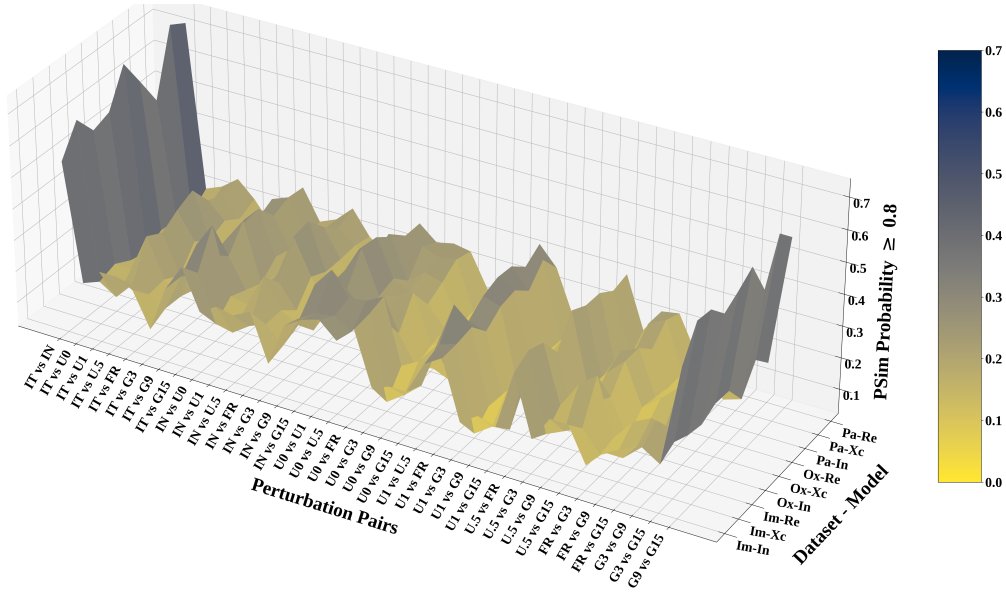

Figure S15: Probabilities of *PSim* score to be above 0.95 for different perturbation pairs across all dataset: model combinations
